# Supplementary material for: Theoretical and experimental study of the ground and excited states of 1,4-dihydropyridine based hexahydroquinoline derivatives achieved by microwave irradiation
Source: Royal Society of Chemistry journal article supplement (doi:10.1039/c7nj02226c), 2017-01-01
Supplement: c7nj02226c1.pdf [file c7nj02226c1.pdf]

## Theoretical and experimental study of ground and excited states of 1,4-dihydropyridine based hexahydroquinoline derivatives achieved by microwave irradiation

Miyase Gözde Gündüz, Claudia de Brito da Silva, Gabriel Modernell Zanotto, Josene Maria Toldo, Rahime Şimşek, Cihat Şafak, Paulo Fernando Bruno Gonçalves and Fabiano Severo Rodembusch

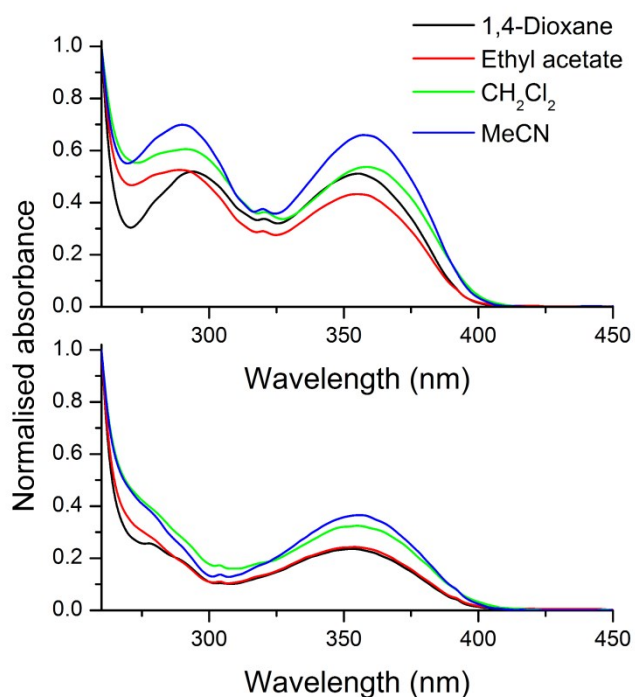

**Figure S1.** Normalised UV-Vis absorption spectra in solution of compounds **10** (top) and **13** (bottom) in different organic solvents.

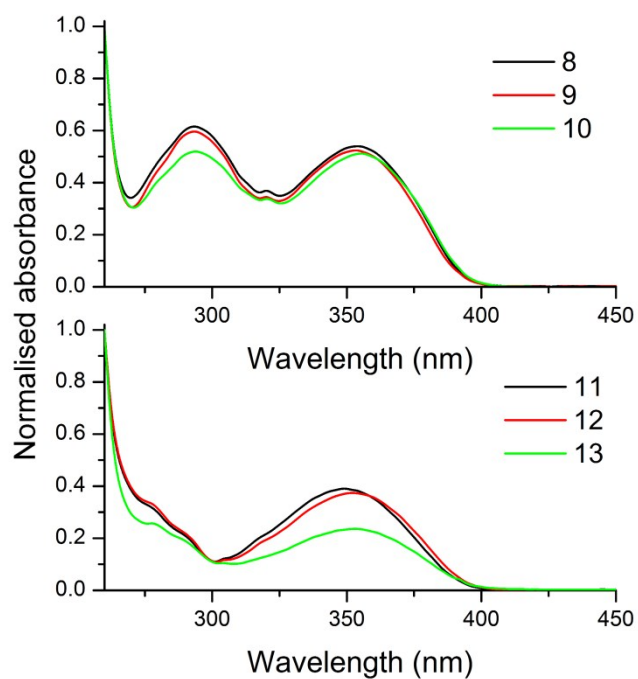

**Figure S2.** Normalised UV-Vis absorption spectra in solution of compounds **8-10** (top) and **11-13** (bottom) in 1,4-Dioxane.

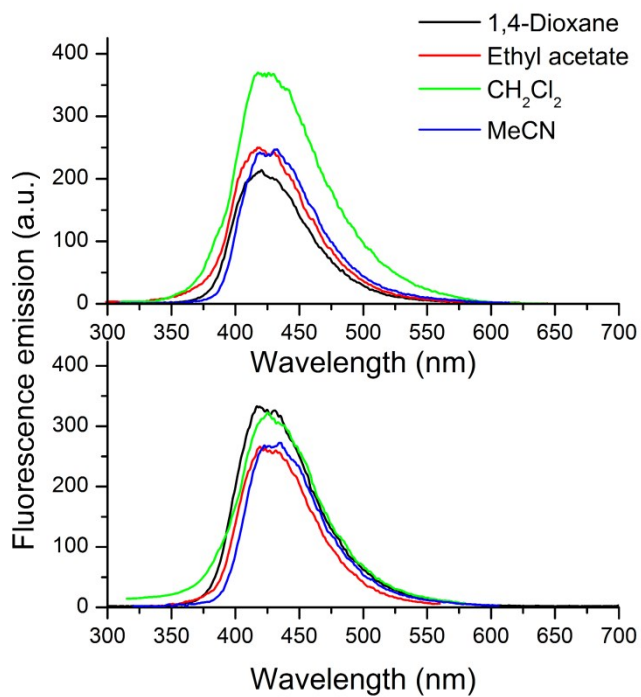

**Figure S3.** Normalised fluorescence emission spectra in solution of compounds **10** (top) and **13** (bottom) in different organic solvents.

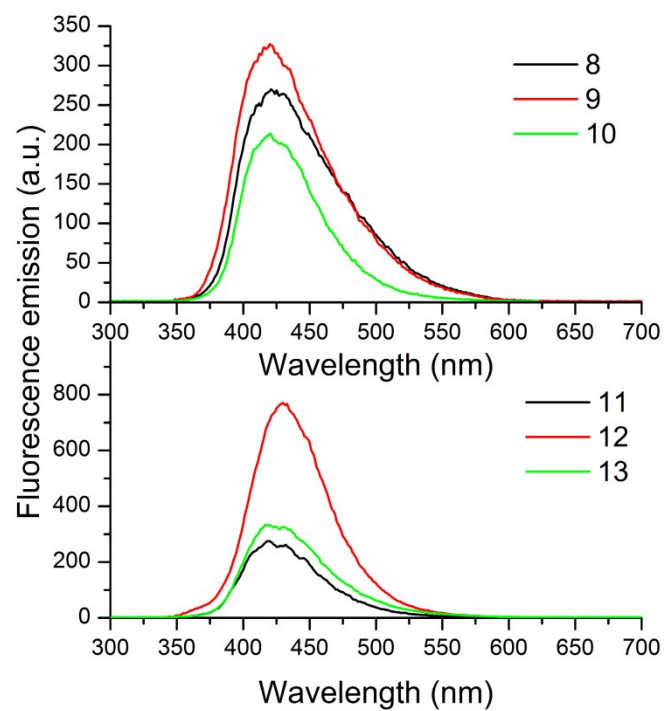

**Figure S4.** Normalised fluorescence emission spectra in solution of compounds **8-10** (top) and **11-13** (bottom) in 1,4-Dioxane.
